# Supplementary material for: Design of load-aware resource allocation for heterogeneous fog computing systems
Source: PeerJ Comput Sci. 2024 Apr 18;10:e1986. doi: 10.7717/peerj-cs.1986 (PMC11041998; doi:10.7717/peerj-cs.1986)
Supplement: Supplemental Information 1 [file peerj-cs-10-1986-s001.xlsx]

## Sheet: Sheet1
Number of Cameras	Latency					Network Consumption					Execution in cloud
	Traditional Cloud Paradigm	Proposed Fog-Cloud Paradigm	Traditional Fog Paradigm			Cloud	Fog Cloud	Gen Fog			Cloud	Fog Cloud	Gen Fog
8	209.5	6.2	6.32			221756	13415.8	15764.6			1.00479e+06	25875.6	28919.5
16	211	6.7	7			443397	26178.9	30264.5			1.7593e+06	55661.6	54776.3
24	211.66	7.3	7.8			664919	39655.9	45499.1			2.60262e+06	71214.4	81233
32	212.33	68.8	119.33			886440	310556	693470			3.37543e+06	1.61926e+06	2.83036e+06
40	521	69.3	119.85			1.04146e+06	389626	865790			3.86445e+06	1.67282e+06	3.32441e+06
48	1292	69.7	121.04			1.05008e+06	468104	1.03905e+06			3.86462e+06	2.21398e+06	3.84826e+06
